# Supplementary material for: Blood pressure variability compromises vascular function in middle-aged mice
Source: eLife. 2025 Oct 22;14:RP104082. doi: 10.7554/eLife.104082 (PMC12543325; doi:10.7554/eLife.104082)
Supplement: Source data 1. [file elife-104082-data1.xlsx]

## Sheet: Supplement 1A
MAP (mmHg)	Diameter (μm)
73.236	16.6713
72.621	16.5314
72.012	16.494
71.343	16.3317
70.53	16.4503
69.83	16.3163
69.536	16.5866
69.071	16.6912
68.919	16.9037
68.463	16.8039
68.009	16.8914
67.731	16.7996
67.787	16.7074
67.675	16.7797
67.557	16.9146
67.591	16.8717
67.874	17.0998
67.656	16.9957
67.842	17.065
67.694	16.9494
67.779	16.9363
68.111	16.9503
68.153	17.0762
68.02	17.1974
67.919	17.0499
68.018	17.0116
68.022	17.2305
67.11	17.0237
66.668	16.8841
66.647	16.7495
67.21	16.7291
67.058	16.9441
67.333	17.2148
68.567	16.9302
68.571	16.7161
67.794	16.7872
67.646	17.0941
67.765	17.0682
67.964	17.0194
67.851	16.9358
67.892	17.1668
68.093	17.1454
68.639	16.9874
68.444	17.0546
67.671	17.7227
67.273	17.3032
66.355	16.991
65.93	17.0856
65.662	17.5453
65.981	16.8779
65.466	16.9076
66.367	17.3487
66.165	17.3326
66.194	16.8831
65.775	16.8584
65.936	17.5356
65.519	17.1467
65.517	16.9039
65.596	17.322
66.097	17.3724
66.692	16.9918
67.743	17.0675
69.289	17.5025
69.84	17.4986
69.97	17.089
69.528	17.0369
69.855	17.4988
69.632	16.9242
69.253	16.9932
68.998	17.4533
69.248	17.1206
69.535	16.9484
69.917	16.8072
70.103	16.8984
70.192	16.7466
70.271	16.4601
70.543	16.5906
75.039	16.3836
75.492	16.4801
75.926	16.3802
76.085	16.6625
76.781	16.7349
77.328	16.5849
77.538	16.3452
78.067	16.3983
78.205	16.4786
78.469	16.3703
78.313	16.5603
78.31	16.5999
78.201	16.5752
78.735	16.6781
78.34	16.3462
78.911	16.3219
78.764	16.5219
78.532	16.4277
78.042	16.4339
72.112	16.1067
72.885	16.1861
71.607	16.2154
70.36	16.3368
68.26	16.6303
65.767	16.9534
72.319	17.2043
71.418	17.2578
69.924	17.4311
68.527	17.7197
67.548	17.4953
66.961	17.6591
66.682	17.7106
66.003	17.4894
66.477	17.6041
66.873	17.6248
67.884	17.5941
68.516	17.449
69.878	17.4284
71.08	17.3635
71.862	17.2795
72.778	17.0055
73.692	16.9318
74.534	16.7649
75.461	16.5205
75.853	16.7867
76.529	16.4375
77.02	16.1636
78.195	16.178
78.92	16.4892
80.126	15.7868
80.876	15.4648
81.448	15.758
82.268	15.5506
82.477	15.4584
82.649	15.3815
84.42	15.9898
85.763	15.4351
86.239	15.1562
87.837	15.696
87.556	15.9207
87.181	15.3454
86.229	15.133
86.507	15.7624
87.467	15.1651
89.097	15.1321
89.238	15.5019
88.963	15.8431
88.835	15.3901
89.058	15.1814
88.643	15.8096
88.267	15.3669
87.513	15.3266
87.309	15.6362
87.009	15.5326
85.732	15.809
84.538	15.9025
83.225	15.7613
82.222	15.778
81.481	16.1239
79.279	16.0753
74.417	16.2266
73.612	16.6007
73.183	16.7702
71.926	17.3306
73.171	17.2707
75.202	17.199
73.317	17.172
71.741	17.367
64.061	17.9309
61.472	17.8869
61.251	18.0903
61.449	17.8829
62.55	17.7682
63.844	17.7814
65.366	17.5117
66.165	17.685
67.34	17.4519
68.059	17.3269
68.676	17.1622
69.382	17.1975
69.38	17.1542
69.262	17.3529
69.2	17.1282
68.993	17.4258
68.583	17.333
68.257	17.4425
67.779	17.6565
67.67	17.3112
67.817	17.3169
67.286	17.0667
67.297	17.0306
67.353	17.028
67.423	17.2098
67.517	16.8976
67.819	16.9209
67.851	16.8896
67.921	16.963
68.168	16.8939
68.616	17.1585
68.636	17.1664
69.001	17.3741
68.803	17.3868
68.754	17.729
68.723	17.5032
69.057	17.5902
69.079	17.6771
68.792	17.8637
68.49	17.6637
68.049	17.812
67.654	17.3151
67.496	17.3085
66.807	17.6097
66.492	17.4124
65.971	17.2062
65.652	17.4821
64.888	17.4694
64.367	17.4117
64.643	17.3483
64.836	17.2317
65.385	17.2046
65.971	17.3667
66.434	17.5938
67.019	17.8985
67.367	17.5877
67.41	17.4038
67.166	17.2937
66.266	17.2919
66.125	17.0545
65.924	17.3093
65.847	17.2585
65.617	17.3365

## Sheet: Supplement 1B
MAP (mmHg)	Diameter (μm)
70.028	17.1294
71.554	17.111
73.083	16.9886
74.777	16.8382
75.813	16.747
69.563	17.0204
70.132	17.1374
70.093	16.9963
69.019	17.1295
66.423	16.9396
64.012	17.3093
62.89	17.7636
62.165	18.3125
63.21	18.6501
64.867	18.8522
66.55	18.8397
69.207	18.9246
71.614	18.8876
71.459	18.6653
68.845	18.3137
66.079	17.9728
63.405	18.0366
61.913	18.1804
62.066	18.3227
62.765	18.6542
63.908	18.9083
65.373	18.7888
68.011	18.1651
70.107	17.7522
71.94	17.5234
70.685	17.5916
68.206	17.5495
65.631	17.359
63.449	17.8448
62.446	17.6816
62.415	18.1562
62.91	18.2654
65.063	18.4246
67.38	18.2327
69.616	17.6647
69.378	17.098
66.717	17.3629
64.041	17.4278
62.281	17.407
61.055	17.4935
60.485	17.3657
60.179	17.5596
59.931	18.2517
61.116	18.0371
62.855	17.8037
64.598	17.2281
66.422	17.2631
66.91	17.1221
64.95	17.1471
62.911	17.4566
61.64	17.6359
60.312	17.846
60.26	17.9713
60.067	17.7839
60.789	17.701
61.331	17.9329
61.846	17.6353
62.332	17.6347
61.89	17.6777
62.625	17.9189
63.856	17.6234
65.316	17.6523
67.101	17.8275
78.077	17.561
78.074	17.584
82.354	17.4943
85.165	17.5555
88.763	17.6266
93.208	17.4435
94.353	17.5574
100.303	17.2285
96.471	17.2629
95.738	17.1367
94.636	17.5283
93.632	17.4544
93.082	18.8073
93.145	20.1703
101.516	20.5292
101.513	20.766
102.276	20.7602
101.076	20.7486
101.384	19.5338
101.293	18.2648
100.813	17.8537
100.479	17.5549
99.541	17.1641
98.904	17.1751
98.698	17.3648
98.884	17.066
98.763	17.2164
98.575	17.0464
99.428	17.0668
98.821	16.8543
100.211	17.0271
100.719	16.7931
100.304	17.3411
98.491	17.2197
98.893	16.9671
98.046	16.9786
96.176	16.9613
95.123	17.0551
93.649	17.076
94.313	17.3055
94.489	16.4683
95.9	16.6057
98.387	16.6622
101.62	16.6846
103.036	16.6105
103.616	16.706
103.859	16.8041
105.324	16.9132
107.212	16.8332
109.17	16.8887
110.398	16.8083
108.201	17.023
112.835	17.9872
114.377	18.6025
115.208	18.5359
112.247	18.3113
110.079	17.9728
109.238	18.4723
108.631	19.0259
107.927	19.3419
113.299	19.5106
113.404	19.6587
113.321	19.7526
114.501	19.8398
115.248	19.7031
116.454	18.6925
117.27	18.0913
117.835	17.9689
118.899	17.5377
118.712	17.3597
118.21	17.2143
117.778	17.0664
116.44	16.8569
115.278	17.487
115.826	17.8105
115.553	17.7819
115.601	17.5913
115.329	17.2988
113.534	17.1035
112.752	16.8135
110.84	16.8041
110.826	16.6466
109.308	16.8165
108.116	16.4926
108.082	16.1872
109.074	16.4948
107.115	16.3467
107.373	16.3311
106.938	16.5844
108.6	16.4564
104.642	16.5061
106.986	16.7613
104.962	16.5978
101.091	16.6272
97.69	16.7722
95.265	16.6116
93.052	16.9199
98.085	17.1927
97.012	18.0818
96.655	19.0457
94.422	19.243
91.862	19.5357
90.151	18.9667
87.365	18.6516
83.285	18.6121
78.242	18.3003
76.636	18.3958
72.665	18.1715
71.216	18.229
71.742	18.1489
72.04	18.0475
70.297	18.1737
70.506	18.0815
70.808	18.039
71.085	18.0488
70.969	18.1404
72.02	18.104
71.499	18.2606
70.348	18.4175
69.409	18.2454
67.384	18.1917
65.893	18.442
66.887	18.3563
66.973	18.2255
68.503	18.3077
68.909	18.436
63.317	18.2994
63.718	18.3869
63.699	18.2103
63.003	18.2992
62.468	18.4429
62.765	18.5339
63.511	18.455
66.791	18.2147
72.884	18.3053
72.692	18.2655
71.448	18.5043
71.267	18.5725
70.926	18.3599
70.185	18.529
69.263	18.4716
68.409	18.3675
68.691	18.1023
68.705	18.3685
67.846	18.6843
67.748	18.2344
66.931	18.2576
67.876	18.0865
68.769	18.3646
69.093	18.3218
68.72	18.486
68.774	18.301
67.804	18.2971
66.552	18.1801

## Sheet: Supplement 1C
MAP (mmHg)	Diameter (μm)
66.961	17.6591
66.682	17.7106
66.003	17.4894
66.477	17.6041
66.873	17.6248
67.884	17.5941
68.516	17.449
69.878	17.4284
71.08	17.3635
71.862	17.2795
72.778	17.0055
73.692	16.9318
74.534	16.7649
75.461	16.5205
75.853	16.7867
76.529	16.4375
77.02	16.1636
78.195	16.178
78.92	16.4892
80.126	15.7868
80.876	15.4648
81.448	15.758
82.268	15.5506
82.477	15.4584
82.649	15.3815
84.42	15.9898
85.763	15.4351
86.239	15.1562
87.837	15.696
87.556	15.9207
87.181	15.3454
86.229	15.133
86.507	15.7624
87.467	15.1651
89.097	15.1321
89.238	15.5019
88.963	15.8431
88.835	15.3901
89.058	15.1814
88.643	15.8096
88.267	15.3669
87.513	15.3266
87.309	15.6362
87.009	15.5326
85.732	15.809
84.538	15.9025
83.225	15.7613
82.222	15.778
81.481	16.1239
79.279	16.0753
74.417	16.2266
73.612	16.6007
73.183	16.7702
71.926	17.3306
73.171	17.2707
75.202	17.199
73.317	17.172
71.741	17.367
64.061	17.9309
61.472	17.8869

## Sheet: Supplement 1D
MAP (mmHg)	Diameter (μm)
60.789	17.701
61.331	17.9329
61.846	17.6353
62.332	17.6347
61.89	17.6777
62.625	17.9189
63.856	17.6234
65.316	17.6523
67.101	17.8275
78.077	17.561
78.074	17.584
82.354	17.4943
85.165	17.5555
88.763	17.6266
93.208	17.4435
94.353	17.5574
100.303	17.2285
96.471	17.2629
95.738	17.1367
94.636	17.5283
93.632	17.4544
93.082	18.8073
93.145	20.1703
101.516	20.5292
101.513	20.766
102.276	20.7602
101.076	20.7486
101.384	19.5338
101.293	18.2648
100.813	17.8537
100.479	17.5549
99.541	17.1641
98.904	17.1751
98.698	17.3648
98.884	17.066
98.763	17.2164
98.575	17.0464
99.428	17.0668
98.821	16.8543
100.211	17.0271
100.719	16.7931
100.304	17.3411
98.491	17.2197
98.893	16.9671
98.046	16.9786
96.176	16.9613
95.123	17.0551
93.649	17.076
94.313	17.3055
94.489	16.4683
95.9	16.6057
98.387	16.6622
101.62	16.6846
103.036	16.6105
103.616	16.706
103.859	16.8041
105.324	16.9132
107.212	16.8332
109.17	16.8887
110.398	16.8083
108.201	17.023
112.835	17.9872
114.377	18.6025
115.208	18.5359
112.247	18.3113
110.079	17.9728
109.238	18.4723
108.631	19.0259
107.927	19.3419
113.299	19.5106
113.404	19.6587
113.321	19.7526
114.501	19.8398
115.248	19.7031
116.454	18.6925
117.27	18.0913
117.835	17.9689
118.899	17.5377
118.712	17.3597
118.21	17.2143
117.778	17.0664
116.44	16.8569
115.278	17.487
115.826	17.8105
115.553	17.7819
115.601	17.5913
115.329	17.2988
113.534	17.1035
112.752	16.8135
110.84	16.8041
110.826	16.6466
109.308	16.8165
108.116	16.4926
108.082	16.1872
109.074	16.4948
107.115	16.3467
107.373	16.3311
106.938	16.5844
108.6	16.4564
104.642	16.5061
106.986	16.7613
104.962	16.5978
101.091	16.6272
97.69	16.7722
95.265	16.6116
93.052	16.9199
98.085	17.1927
97.012	18.0818
96.655	19.0457
94.422	19.243
91.862	19.5357
90.151	18.9667
87.365	18.6516
83.285	18.6121
78.242	18.3003
76.636	18.3958
72.665	18.1715
71.216	18.229
71.742	18.1489
72.04	18.0475
70.297	18.1737
70.297	18.1737

## Sheet: Supplement 1E
MAP (mmHg)	Diameter (μm)
66.961	17.6591
66.682	17.7106
66.003	17.4894
66.477	17.6041
66.873	17.6248
67.884	17.5941
68.516	17.449
69.878	17.4284
71.08	17.3635
71.862	17.2795
72.778	17.0055
73.692	16.9318
74.534	16.7649
75.461	16.5205
76.529	16.4375
77.02	16.1636
78.195	16.178
80.126	15.7868
80.876	15.4648
82.268	15.5506
82.477	15.4584
82.649	15.3815
85.763	15.4351
86.239	15.1562
87.181	15.3454
86.229	15.133
87.467	15.1651
89.097	15.1321
88.835	15.3901
89.058	15.1814
88.267	15.3669
87.513	15.3266
87.309	15.6363
87.009	15.5326
85.732	15.809
84.538	15.9025
83.225	15.7613
82.222	15.778
81.481	16.1239
79.279	16.0754
74.417	16.2266
73.612	16.6007
73.183	16.7702
71.926	17.3306
73.171	17.2707
75.202	17.199
73.317	17.172
71.741	17.367
64.061	17.9309
61.472	17.8869

## Sheet: Supplement 1F
MAP (mmHg)	Diameter (μm)
60.789	17.701
61.331	17.9329
61.846	17.6353
62.332	17.6347
61.89	17.6777
62.625	17.9189
63.856	17.6234
65.316	17.6523
67.101	17.8275
78.077	17.561
78.074	17.584
82.354	17.4943
85.165	17.5555
88.763	17.6266
93.208	17.4435
94.353	17.5574
100.303	17.2285
96.471	17.2629
95.738	17.1367
99.541	17.1641
98.904	17.1751
98.698	17.3648
98.884	17.066
98.763	17.2164
98.575	17.0464
99.428	17.0668
98.821	16.8543
100.211	17.0271
100.719	16.7931
100.304	17.3411
98.491	17.2197
98.893	16.9671
98.046	16.9786
96.176	16.9613
95.123	17.0551
93.649	17.076
94.313	17.3055
94.489	16.4683
95.9	16.6057
98.387	16.6622
101.62	16.6846
103.036	16.6105
103.616	16.706
103.859	16.8041
105.324	16.9132
107.212	16.8332
109.17	16.8887
117.778	17.0664
112.752	16.8135
110.84	16.8041
110.826	16.6466
109.308	16.8165
108.116	16.4926
108.082	16.1872
109.074	16.4948
107.115	16.3467
107.373	16.3311
106.938	16.5844
108.6	16.4564
104.642	16.5061
106.986	16.7613
104.962	16.5978
101.091	16.6272
97.69	16.7722
95.265	16.6116
93.052	16.9199
78.242	18.3003
76.636	18.3958
72.665	18.1715
71.216	18.229
71.742	18.1489
72.04	18.0475
70.297	18.1737

## Sheet: Supplement 1G
MAP (mmHg)	Diameter (μm)
66.961	17.6591
66.682	17.7106
66.003	17.4894
66.477	17.6041
66.873	17.6248
67.884	17.5941
68.516	17.449
69.878	17.4284
71.08	17.3635
71.862	17.2795
72.778	17.0055
73.692	16.9318
74.534	16.7649
75.461	16.5205
76.529	16.4375
77.02	16.1636
78.195	16.178
80.126	15.7868
80.876	15.4648
82.268	15.5506
82.477	15.4584
82.649	15.3815
85.763	15.4351
86.239	15.1562
87.181	15.3454
86.229	15.133
87.467	15.1651
89.097	15.1321
88.835	15.3901
89.058	15.1814
88.267	15.3669
87.513	15.3266
87.309	15.6363
87.009	15.5326
85.732	15.809
84.538	15.9025
83.225	15.7613
82.222	15.778
81.481	16.1239
79.279	16.0754
74.417	16.2266
73.612	16.6007
73.183	16.7702
71.926	17.3306
73.171	17.2707
75.202	17.199
73.317	17.172
71.741	17.367
64.061	17.9309
61.472	17.8869

## Sheet: Supplement 1H
MAP (mmHg)	Diameter (μm)
60.789	17.701
61.331	17.9329
61.846	17.6353
62.332	17.6347
61.89	17.6777
62.625	17.9189
63.856	17.6234
65.316	17.6523
67.101	17.8275
78.077	17.561
78.074	17.584
82.354	17.4943
85.165	17.5555
88.763	17.6266
93.208	17.4435
94.353	17.5574
100.303	17.2285
96.471	17.2629
95.738	17.1367
99.541	17.1641
98.904	17.1751
98.698	17.3648
98.884	17.066
98.763	17.2164
98.575	17.0464
99.428	17.0668
98.821	16.8543
100.211	17.0271
100.719	16.7931
100.304	17.3411
98.491	17.2197
98.893	16.9671
98.046	16.9786
96.176	16.9613
95.123	17.0551
93.649	17.076
94.313	17.3055
94.489	16.4683
95.9	16.6057
98.387	16.6622
101.62	16.6846
103.036	16.6105
103.616	16.706
103.859	16.8041
105.324	16.9132
107.212	16.8332
109.17	16.8887
117.778	17.0664
112.752	16.8135
110.84	16.8041
110.826	16.6466
109.308	16.8165
108.116	16.4926
108.082	16.1872
109.074	16.4948
107.115	16.3467
107.373	16.3311
106.938	16.5844
108.6	16.4564
104.642	16.5061
106.986	16.7613
104.962	16.5978
101.091	16.6272
97.69	16.7722
95.265	16.6116
93.052	16.9199
78.242	18.3003
76.636	18.3958
72.665	18.1715
71.216	18.229
71.742	18.1489
72.04	18.0475
70.297	18.1737

## Sheet: Supplement 2A
MAP (mmHg)
Mice with craniotomy (+)	Mice without craniotomy (-)
110.333	109.766
109.862	105.764
110.918	102.98
116.321	92.8854
104.677	110.939
111.434	111.007
100.294
117.019
116.72
107.794
105.45
115.411
121.958
113.866

## Sheet: Supplement 2B
		Control Spring-Summer (mmHg)												Control Fall-Winter (mmHg)
	Baseline	110.333	109.862	110.918	116.321	104.677	111.434	100.294	117.019	116.72	107.794	111.007		105.45	115.411	121.958	113.866	109.766	105.764	102.98	92.8854	110.939
	1-2	111.454	112.2	111.118	115.402	112.364	111.42	107.425	113.186	114.158	108.08	107.743		113.172	120.136	112.281	105.512	106.662	102.906	103.745	91.6827	107.75
	3-4	110.896	113.039	105.427	117.886	107.502	112.17	108.222	112.172	116.241	110.264	107.946		107.507	118.051	125.773	100.611	108.007	101.954	103.716	91.4306	108.901
	5-6	110.993	112.669	108.638	113.178	112.544	113.065	105.698	107.971	118.804	109.498	110.727		107.492	114.324	128.99	104.219	111.546	110.779	103.682	93.8531	106.928
	7-8	112.764	115.752	107.659	110.302	111.936	108.896	126.196	106.899	117.822	109.661	110.44		103.227	118.001	130.537	104.03	117.21	108.759	101.045	93.7059	109.551
	9-10	112.429	113.138	107.445	111.682	112.091	110.753	116.428	106.276	112.485	109.468	101.301		116.118	118.517	132.376	104.318	106.695	105.244	97.8395	92.8759	107.572
	11-12	113.104	115.448	106.86	112.216	111.972	111.71	115.079	106.947	112.632	108.855	102.641		112.286	123.905	130.141	106.661	110.016	104.069	94.9942	91.8547	107.534
	13-14	113.667	113.789	107.417	112.65	112.858	113.452	111.591	107.346	113.927	111.403	101.077		112.542	132.12	130.814	107.642	111.877	102.858	96.1065	93.2508	106.361
	15-16	109.943	111.481	108.31	111.104	112.722	114.603	111.225	105.549	125.579	111.302	102.563		108.11	117.319	125.647	105.659	108.641	103.704	87.1429	96.8887	105.167
	17-18	109.729	106.249	112.03	111.692	113.801	115.726	98.347	104.361	147.108	110.364	105.159		110.588	108.159	127.882	102.235	108.926	103.586	85.6112	95.4905	105.901
	19-20	109.629	105.142	110.697	112.536	113.665		90.0691	107.612	127.748	109.777	106.146		110.677	108.034	126.166	103.706	104.804	104.228	86.1957	95.1336	107.025

[truncated: 87 more sheets: Figure 1B (Saline Infusion), Figure 1B (Ang II Infusion), Figuer 1C MAP, Figure 1C SBP, Figure 1C DBP, Figure 1C PP, Figure 1D MAP, Figure 1D SBP, Figure 1D DBP, Figure 1D PP, Supplement 3A, Supplement 3B, Supplement 3C, Supplement 3D, Figure 2A (Inactive), Figure 2A (Active), Figure 2B (Inactive), Figure 2B (Active), Figure 2C (Inactive), Figure 2C (Active) …]
